# Supplementary material for: Loss of symmetric cell division of apical neural progenitors drives DENND5A-related developmental and epileptic encephalopathy
Source: PubMed Central journal article supplement (PMC10863025; doi:10.1101/2022.08.23.22278845), 2024-01-31
Supplement: media-1.pdf [file media-1.pdf]

**Supplementary Information**  
**for**  
**Loss of symmetric cell division of apical neural progenitors drives**  
***DENND5A*-related developmental and epileptic encephalopathy**

Emily Banks<sup>1</sup>, Vincent Francis<sup>1</sup>, Sheng-Jia Lin<sup>2</sup>, Fares Kharfallah<sup>1</sup>, Vladimir Fonov<sup>1</sup>, Maxime Levesque<sup>1</sup>, Chanshuai Han<sup>1</sup>, Gopinath Kulasekaran<sup>1</sup>, Marius Tuznik<sup>1</sup>, Armin Bayati<sup>1</sup>, Reem Al-Khater<sup>3</sup>, Fowzan S. Alkuraya<sup>4</sup>, Loukas Argyriou<sup>5</sup>, Meisam Babaei<sup>6</sup>, Melanie Bahlo<sup>7</sup>, Behnoosh Bakhshoodeh<sup>8</sup>, Eileen Barr<sup>9</sup>, Lauren Bartik<sup>10,11</sup>, Mahmoud Bassiony<sup>12</sup>, Miriam Bertrand<sup>13</sup>, Dominique Braun<sup>14</sup>, Rebecca Buchert<sup>13</sup>, Mauro Budetta<sup>15</sup>, Maxime Cadieux-Dion<sup>16</sup>, Daniel Calame<sup>17-19</sup>, Heidi Cope<sup>20</sup>, Donna Cushing<sup>21</sup>, Stephanie Efthymiou<sup>22</sup>, Marwa A. Elmaksoud<sup>23</sup>, Huda G. El Said<sup>24</sup>, Tawfiq Froukh<sup>25</sup>, Harinder K. Gill<sup>26</sup>, Joseph G. Gleeson<sup>27,28</sup>, Laura Gogoll<sup>14</sup>, Elaine S.-Y. Goh<sup>21</sup>, Vykuntaraju K Gowda<sup>29</sup>, Tobias B. Haack<sup>13</sup>, Mais O. Hashem<sup>4</sup>, Stefan Hauser<sup>30,31</sup>, Trevor L. Hoffman<sup>32</sup>, Jacob S. Hogue<sup>33</sup>, Akimoto Hosokawa<sup>34</sup>, Henry Houlden<sup>22</sup>, Kevin Huang<sup>2</sup>, Stephanie Huynh<sup>26</sup>, Ehsan G. Karimiani<sup>35,36</sup>, Silke Kaulfuß<sup>5</sup>, G. Christoph Korenke<sup>37</sup>, Amy Kritzer<sup>38</sup>, Hane Lee<sup>39</sup>, James R. Lupski<sup>17-19,40</sup>, Elysa J. Marco<sup>41</sup>, Kirsty McWalter<sup>42</sup>, Arakel Minassian<sup>43</sup>, Berge A. Minassian<sup>44</sup>, David Murphy<sup>22</sup>, Juanita Neira-Fresneda<sup>9</sup>, Hope Northrup<sup>45</sup>, Denis Nyaga<sup>34</sup>, Barbara Oehl-Jaschkowitz<sup>46</sup>, Matthew Osmond<sup>47</sup>, Richard Person<sup>42</sup>, Davut Pehlivan<sup>17-19</sup>, Cassidy Petree<sup>2</sup>, Lynette G. Sadleir<sup>34</sup>, Carol Saunders<sup>10,16,48</sup>, Ludger Schoels<sup>30,31</sup>, Vandana Shashi<sup>20</sup>, Rebecca C. Spillman<sup>20</sup>, Varunvenkat M. Srinivasan<sup>29</sup>, Paria N. Torbati<sup>36</sup>, Tulay Tos<sup>49</sup>, Undiagnosed Diseases Network<sup>†</sup>, Maha S. Zaki<sup>50</sup>, Dihong Zhou<sup>10,11</sup>, Christiane Zweier<sup>14</sup>, Jean-François Trempe<sup>51</sup>, Thomas M. Durcan<sup>1</sup>, Ziv Gan-Or<sup>1,52</sup>, Massimo Avoli<sup>1</sup>, Cesar Alves<sup>53</sup>, Guarav K. Varshney<sup>2</sup>, Reza Maroofian<sup>22</sup>, David A. Rudko<sup>1</sup>, Peter S. McPherson<sup>1</sup>.

<sup>1</sup> Department of Neurology and Neurosurgery, Montreal Neurological Institute, McGill University, Montréal, QC H3A 2B4, Canada

<sup>2</sup> Genes & Human Disease Research Program, Oklahoma Medical Research Foundation, Oklahoma City, OK, 73104, USA

<sup>3</sup> Johns Hopkins Aramco Healthcare, Dhahran 34465, Saudi Arabia

<sup>4</sup> Department of Translational Genomics, Center for Genomic Medicine, King Faisal Specialist Hospital and Research Center, Riyadh 11211, Saudi Arabia

<sup>5</sup> Institute of Human Genetics, University Medical Center, Göttingen 37073, Germany

<sup>6</sup> Department of Pediatrics, North Khorasan University of Medical Sciences, Bojnurd, Iran

<sup>7</sup> Walter and Eliza Hall Institute for Medical Research, Parkville Victoria 3052, Australia

<sup>8</sup> Mashhad University of Medical Sciences, Mashhad, Iran

<sup>9</sup> Emory University, Department of Human Genetics, Atlanta, GA 30322, USA

<sup>10</sup> University of Missouri-Kansas City, School of Medicine, Kansas City, MO 64108, USA

<sup>11</sup> Department of Pediatrics, Division of Clinical Genetics, Children's Mercy Hospital, Kansas City, MO 64108, USA

<sup>12</sup> Faculty of Medicine, Alexandria University, Alexandria, Egypt

<sup>13</sup> Institute of Medical Genetics and Applied Genomics, University of Tübingen, Tübingen 72076, Germany

<sup>14</sup> Department of Human Genetics, Inselspital, Bern University Hospital, University of Bern, Bern, Switzerland

<sup>15</sup> Paediatric and Child Neurology Unit, Cava de' Tirreni AOU S. Giovanni di Dio e Ruggiero d'Aragona Hospital, Salerno, Italy

<sup>16</sup> Department of Pathology and Laboratory Medicine, Children's Mercy Hospital, Kansas City, MO 64108, USA

<sup>17</sup> Department of Pediatrics, Baylor College of Medicine, Houston, TX, USA

<sup>18</sup> Texas Children's Hospital, Houston, TX, USA

<sup>19</sup> Department of Molecular and Human Genetics, Baylor College of Medicine, Houston, TX, USA

<sup>20</sup> Division of Medical Genetics, Department of Pediatrics, Duke University Medical Center, Durham, NC 27710, USA

<sup>21</sup> Laboratory Medicine and Genetics, Trillium Health Partners, Mississauga, ON L5B 1B8, Canada

<sup>22</sup> Department of Neuromuscular Diseases, University College London (UCL) Institute of Neurology, Queen Square, London, WC1N 3BG, UK

<sup>23</sup> Neurology Unit, Department of Pediatrics, Faculty of Medicine, University of Alexandria, Alexandria, Egypt

<sup>24</sup> Department of Family Health, High Institute of Public Health, Faculty of Medicine, University of Alexandria, Alexandria, Egypt

<sup>25</sup> Department of Biotechnology and Genetic Engineering, Philadelphia University, Amman 19392, Jordan

<sup>26</sup> Provincial Medical Genetics Program at BC Women's Health Centre, Vancouver, BC V6H 3N1, Canada

<sup>27</sup> Department of Neurosciences, University of California San Diego, La Jolla, CA, USA

- <sup>28</sup> Rady Children's Institute for Genomic Medicine, San Diego, CA, USA
- <sup>29</sup> Department of Pediatric Neurology, Indira Gandhi Institute of Child Health, Bangalore, India
- <sup>30</sup> Center for Neurology and Hertie Institute for Clinical Brain Research, University Tübingen, Tübingen 72076, Germany
- <sup>31</sup> German Center of Neurodegenerative Diseases (DZNE), Tübingen 72076, Germany
- <sup>32</sup> Southern California Kaiser Permanente Medical Group, Department of Regional Genetics, Anaheim, CA 92806, USA
- <sup>33</sup> Madigan Army Medical Center, Tacoma, WA 98431, USA
- <sup>34</sup> Department of Paediatrics and Child Health, University of Otago, Wellington, 6242, New Zealand
- <sup>35</sup> Molecular and Clinical Sciences Institute, St. George's, University of London, Cranmer Terrace, London SW17 0RE, UK
- <sup>36</sup> Department of Medical Genetics, Next Generation Genetic Polyclinic, Mashhad, Iran
- <sup>37</sup> Department of Neuropediatrics, University Children's Hospital, Klinikum Oldenburg, Oldenburg 26133, Germany
- <sup>38</sup> Division of Genetics and Genomics, Boston Children's Hospital, Boston, MA 02115, USA
- <sup>39</sup> 3billion, Inc, Seoul, South Korea
- <sup>40</sup> Human Genome Sequencing Center, Baylor College of Medicine, Houston, TX, USA
- <sup>41</sup> Cortica Healthcare, San Rafael, CA 94903, USA
- <sup>42</sup> GeneDx, Gaithersburg, MD 20877, USA
- <sup>43</sup> Centre for Applied Genomics, Genetics, and Genome Biology, Hospital for Sick Children, Toronto, ON M5G 0A4, Canada
- <sup>44</sup> UT Southwestern Medical Center, Departments of Pediatrics and Neurology, Dallas, TX 75390, USA

<sup>45</sup> Department of Pediatrics, McGovern Medical School at the University of Texas Health Science Center at Houston (UTHealth) and Children’s Memorial Hermann Hospital, Houston, TX 77030, USA

<sup>46</sup> Practice of Human Genetics, Homburg (Saar), Germany

<sup>47</sup> Children’s Hospital of Eastern Ontario Research Institute, University of Ottawa, Ottawa K1H 8L1, Canada

<sup>48</sup> Center for Pediatric Genomic Medicine Children’s Mercy - Kansas City, Missouri, USA

<sup>49</sup> University of Health Sciences, Zubeyde Hanım Research and Training Hospital of Women’s Health and Diseases, Department of Medical Genetics, Ankara 06080, Turkey

<sup>50</sup> Human Genetics and Genome Research Division, Clinical Genetics Department, National Research Centre, Cairo, Egypt

<sup>51</sup> Department of Pharmacology & Therapeutics and Centre de Recherche en Biologie Structurale, McGill University, Montréal, QC H3G 1Y6, Canada

<sup>52</sup> Department of Human Genetics, McGill University, Montréal, QC H3A 2B4, Canada

<sup>53</sup> Division of Neuroradiology, The Children's Hospital of Philadelphia, Philadelphia, PA 19104, USA

† The full list of authors in network is in Supplementary Notes.

## Table of Contents

|                                                      | <b>Page</b> |
|------------------------------------------------------|-------------|
| <b>1. Supplementary Methods</b>                      |             |
| <b>a. Motor skills scoring system.....</b>           | <b>5</b>    |
| <b>b. Neurological phenotype scoring system.....</b> | <b>6</b>    |
| <b>c. Communication skills scoring system.....</b>   | <b>7</b>    |
| <b>d. Comorbidities scoring system.....</b>          | <b>8</b>    |
| <b>2. Supplementary Notes.....</b>                   | <b>9-10</b> |

## 1. Supplementary Methods

### 1a. Motor skills scoring system

| <b>Item</b>                    | <b>Scoring</b>                                                                                   |
|--------------------------------|--------------------------------------------------------------------------------------------------|
| Able to reach/grasp objects    | +1 if positive                                                                                   |
| Able to roll over              | +1 if positive                                                                                   |
| Able to sit with support       | +1 if positive OR is able to sit without support                                                 |
| Able to sit without support    | +1 if positive                                                                                   |
| Able to stand with support     | +1 if positive OR is able to stand without support                                               |
| Able to stand without support  | +1 if positive                                                                                   |
| Able to walk with support      | +1 if positive OR is able to walk without support                                                |
| Able to walk without support   | +1 if positive                                                                                   |
| Muscle tone or spasm problems  | +1 if negative for all (hyperreflexia, spastic tetraplegia, clonus, and current hyper/hypotonia) |
| Motor regression after seizure | +1 if negative AND could perform one of the above behaviors in past                              |
| <b>TOTAL</b>                   | <b>10</b>                                                                                        |

Scoring system used for quantifying motor abilities. A low score reflects minimal motor abilities, a high score indicates a high degree of motor capabilities. If a child's ability to do a skill is unknown, it is counted as positive.

### 1b. Neurological phenotype scoring system

| <b>Item</b>                                                                                                                    | <b>Scoring</b> |
|--------------------------------------------------------------------------------------------------------------------------------|----------------|
| Seizures                                                                                                                       | +1 if positive |
| Reduced volume (cerebral or supratentorial parenchymal volume loss)                                                            | +1 if positive |
| Cerebellum abnormalities (hypoplastic vermis, reduced volume)                                                                  | +1 if positive |
| Thalamus abnormalities (thalami fusion or reduced volume, massa intermedia prominence)                                         | +1 if positive |
| Basal ganglia abnormalities (dysplasia or reduced volume)                                                                      | +1 if positive |
| Calcifications                                                                                                                 | +1 if positive |
| Ventricle or CSF abnormalities                                                                                                 | +1 if positive |
| White matter abnormalities (reduced corpus callosum or other white matter tract volume, delayed myelination or hyperintensity) | +1 if positive |
| Hemorrhage or ischemic event                                                                                                   | +1 if positive |
| Cortical visual impairment                                                                                                     | +1 if positive |
| <b>TOTAL</b>                                                                                                                   | <b>10</b>      |

Scoring system used for quantifying neurological phenotypes. A low score corresponds to few neurological abnormalities, a high score indicates many neurological abnormalities.

### 1c. Communication skills scoring system

| <b>Item</b>                       | <b>Scoring</b>                                        |
|-----------------------------------|-------------------------------------------------------|
| Smiles                            | +1 if positive                                        |
| Eye contact                       | +1 if positive                                        |
| Points at objects/people          | +1 if positive                                        |
| Babbles                           | +1 if positive OR if speaks in at least single words  |
| Uses PECS board                   | +1 if positive OR if speaks in at least single words  |
| Speaks in single words            | +1 if positive OR if speaks in at least short phrases |
| Speaks in short phrases           | +1 if positive OR if speaks in sentences              |
| Speaks in sentences               | +1 if positive                                        |
| Language regression after seizure | +1 if negative AND if had language skills in past     |
| Receptive language delay          | +1 if negative AND at least babbles                   |
| <b>TOTAL</b>                      | <b>10</b>                                             |

Scoring system used for quantifying communication abilities. A low score reflects minimal communication ability, a high score reflects more advanced language and communication abilities.

#### 1d. Comorbidities scoring system

| <b>Item</b>                                                                                                | <b>Scoring</b> |
|------------------------------------------------------------------------------------------------------------|----------------|
| Chronic constipation                                                                                       | +1 if positive |
| Autism spectrum disorder (formally diagnosed or clinically suspected)                                      | +1 if positive |
| Psychiatric disorders (ADHD, anxiety)                                                                      | +1 if positive |
| Behavioral disorders or abnormalities (self-injury, poor sleep, hyperphagia)                               | +1 if positive |
| Lung or breathing abnormalities (restrictive lung disease, asthma)                                         | +1 if positive |
| Cardiac abnormalities (ventricular/atrial septal defects, arrhythmia)                                      | +1 if positive |
| Blindness                                                                                                  | +1 if positive |
| Obesity                                                                                                    | +1 if positive |
| Bone abnormalities (low density or osteoporosis, scoliosis, vertebral fusion, posterior fossa abnormality) | +1 if positive |
| GERD                                                                                                       | +1 if positive |
| <b>TOTAL</b>                                                                                               | <b>10</b>      |

Scoring system used for quantifying neurological phenotypes. A low score corresponds to few comorbidities, a high score indicates many comorbidities.



## 2. Supplementary Notes

Members of the Undiagnosed Diseases Network include:

Maria T. Acosta, Margaret Adam, David R. Adams, Pankaj B. Agrawal, Mercedes E. Alejandro, Justin Alvey, Laura Amendola, Ashley Andrews, Euan A. Ashley, Mahshid S. Azamian, Carlos A. Bacino, Guney Bademci, Eva Baker, Ashok Balasubramanyam, Dustin Baldrige, Jim Bale, Michael Bamshad, Deborah Barbouth, Gabriel F. Batzli, Pinar Bayrak-Toydemir, Anita Beck, Alan H. Beggs, Edward Behrens, Gill Bejerano, Jimmy Bennet, Beverly Berg-Rood, Raphael Bernier, Jonathan A. Bernstein, Gerard T. Berry, Anna Bican, Stephanie Bivona, Elizabeth Blue, John Bohnsack, Carsten Bonnenmann, Devon Bonner, Lorenzo Botto, Brenna Boyd, Lauren C. Briere, Elly Brokamp, Gabrielle Brown, Elizabeth A. Burke, Lindsay C. Burrage, Manish J. Butte, Peter Byers, William E. Byrd, John Carey, Olveen Carrasquillo, Ta Chen Peter Chang, Sirisak Chanprasert, Hsiao-Tuan Chao, Gary D. Clark, Terra R. Coakley, Laurel A. Cobban, Joy D. Cogan, F. Sessions Cole, Heather A. Colley, Cynthia M. Cooper, Heidi Cope, William J. Craigen, Andrew B. Crouse, Michael Cunningham, Precilla D'Souza, Hongzheng Dai, Surendra Dasari, Mariska Davids, Jyoti G. Dayal, Matthew Deardorff, Esteban C. Dell'Angelica, Shweta U. Dhar, Katrina Dipple, Daniel Doherty, Naghmeh Dorrani, Emilie D. Douine, David D. Draper, Laura Duncan, Dawn Earl, David J. Eckstein, Lisa T. Emrick, Christine M. Eng, Cecilia Esteves, Tyra Estwick, Marni Falk, Liliana Fernandez, Carlos Ferreira, Elizabeth L. Fieg, Paul G. Fisher, Brent L. Fogel, Irman Forghani, Laure Fresard, William A. Gahl, Ian Glass, Rena A. Godfrey, Katie Golden-Grant, Alica M. Goldman, David B. Goldstein, Alana Grajewski, Catherine A. Groden, Andrea L. Gropman, Irma Gutierrez, Sihoun Hahn, Rizwan Hamid, Neil A. Hanchard, Kelly Hassey, Nichole Hayes, Frances High, Anne Hing, Fuki M. Hisama, Ingrid A. Holm, Jason Hom, Martha Horike-Pyne, Alden Huang, Yong Huang, Rosario Isasi, Fariha Jamal, Gail P. Jarvik, Jeffrey Jarvik, Suman Jayadev, Jean M. Johnston, Lefkothea Karaviti, Emily G. Kelley, Jennifer Kennedy, Dana Kiley, Isaac S. Kohane, Jennefer N. Kohler, Deborah Krakow, Donna M. Krasnewich, Elijah Kravets, Susan Korrick, Mary Koziura, Joel B. Krier, Seema R. Lalani, Byron Lam, Christina Lam, Brendan C. Lanpher, Ian R. Lanza, C. Christopher Lau, Kimberly LeBlanc, Brendan H. Lee, Hane Lee, Roy Levitt, Richard A. Lewis, Sharyn A. Lincoln, Pengfei Liu, Xue Zhong Liu, Nicola Longo, Sandra K. Loo, Joseph Loscalzo, Richard L. Maas, Ellen F. Macnamara, Calum A. MacRae, Valerie V. Maduro, Marta M. Majcherska, May Christine V. Malicdan, Laura A. Mamounas, Teri A. Manolio, Rong Mao, Kenneth Maravilla, Thomas C. Markello, Ronit Marom, Gabor Marth, Beth A. Martin, Martin G. Martin, Julian A. Martínez-Agosto, Shruti Marwaha, Jacob McCauley, Allyn McConkie-Rosell, Colleen E. McCormack, Alexa T. McCray, Elisabeth McGee, Heather Mefford, J. Lawrence Merritt, Matthew Might, Ghayda Mirzaa, Eva Morava-Kozicz, Paolo M. Moretti, Marie Morimoto, John J. Mulvihill, David R. Murdock, Mariko Nakano-Okuno, Avi Nath, Stan F. Nelson, John H. Newman, Sarah K. Nicholas, Deborah Nickerson, Donna Novacic, Devin Oglesbee, James P. Orenge, Laura Pace, Stephen Pak, J. Carl Pallais, Christina GS. Palmer, Jeanette C. Papp, Neil H. Parker, John A. Phillips III, Jennifer E. Posey, Lorraine Potocki, Barbara N. Pusey, Aaron Quinlan, Wendy Raskind, Archana N. Raja, Genecee Renteria, Chloe M. Reuter, Lynette Rives, Amy K. Robertson, Lance H. Rodan, Jill A. Rosenfeld, Natalie Rosenwasser, Robb K. Rowley, Maura Ruzhnikov, Ralph Sacco, Jacinda B. Sampson, Susan L. Samson, Mario Saporta, C. Ron

Scott, Judy Schaechter, Timothy Schedl, Kelly Schoch, Daryl A. Scott, Prashant Sharma, Vandana Shashi, Jimann Shin, Rebecca Signer, Catherine H. Sillari, Edwin K. Silverman, Janet S. Sinsheimer, Kathy Sisco, Edward C. Smith, Kevin S. Smith, Emily Solem, Lilianna Solnicka-Krezel, Rebecca C. Spillmann, Joan M. Stoler, Nicholas Stong, Jennifer A. Sullivan, Kathleen Sullivan, Angela Sun, Shirley Sutton, David A. Sweetser, Virginia Sybert, Holly K. Tabor, Cecelia P. Tamburro, Queenie K.-G. Tan, Mustafa Tekin, Fred Telischi, Willa Thorson, Cynthia J. Tiff, Camilo Toro, Alyssa A. Tran, Brianna M.
